# Supplementary material for: Electrochemical detection of SARS-CoV-2 based on copper nanoflower-triggeredin situgrowth of electroactive polymers
Source: Royal Society of Chemistry journal article supplement (doi:10.1039/d3an00716b), 2023-01-01
Supplement: d3an00716b1.pdf [file d3an00716b1.pdf]

## Supplementary Information

for

# Electrochemical detection of SARS-CoV-2 based on copper nanoflowers-triggered in situ growth of electroactive polymers

Ji Lu<sup>#</sup>, Xiaotian Zhou<sup>#</sup>, Yi Li, Min Yu, Siyuan Fu, Zhiling Qu, Yanling Li, Jinfeng Miao and Yuanyuan Xu<sup>\*</sup>

Sanya Institute of Nanjing Agricultural University, MOE Joint International Research Laboratory of Animal Health and Food Safety, Key Laboratory of Animal Physiology & Biochemistry, College of Veterinary Medicine, Nanjing Agricultural University, Nanjing 210095, PR China. Address here.

<sup>\*</sup> E-mail address: xuyuanyuan@njau.edu.cn (Yuanyuan Xu)

<sup>#</sup> These authors contributed equally to this work.

**Table S1** Comparison of different SARS-CoV-2 analytic methods

| Methods                                        | Linear ranges  | LOD      |
|------------------------------------------------|----------------|----------|
| optical aptasensor <sup>1</sup>                | 7.79-123.04 nM | 4.5 nM   |
| disposable Electrochemical Sensor <sup>2</sup> | 5-100 nM       | 500 pM   |
| electrochemical biosensor <sup>3</sup>         | 1-15 $\mu$ M   | 500 nM   |
| fluorescent method <sup>4</sup>                | 0-300 nM       | 35 nM    |
| This work                                      | 0.1-1000 nM    | 33.83 pM |

**Table S2** Comparison of this work and RT-PCR

| Projects              | This work | RT-PCR  |
|-----------------------|-----------|---------|
| sensitivity           | 48.71%    | 38%     |
| specificity           | 100%      | 100%    |
| Reproducibility (RSD) | 0.71%     | N/A     |
| total analysis time   | 3 h       | N/A     |
| complexity            | simple    | complex |
| Portable or not       | Portable  | not     |

## Notes and references

- 1 S. Poolsup, E. Zaripov, N. Hüttmann, Z. Minic, P. V. Artyushenko, I. A. Shchugoreva, F. N. Tomilin, A. S. Kichkailo and M. V. Berezovski, *Mol. Ther. Nucleic. Acids*, 2023, **31**, 731–743.
- 2 N. Farsaeivahid, C. Grenier, S. Nazarian and M. L. Wang, *Sensors (Basel)*, 2022, **23**, 443.
- 3 N. S. Zambry, M. S. Awang, K. K. Beh, H. H. Hamzah, Y. Bustami, G. A. Obande, M. F. Khalid, M. Ozsoz, A. A. Manaf and I. Aziah, *Lab Chip*, 2023, **23**, 1622–1636.
- 4 M. Xu, J. Zhou, Y. Cheng, Z. Jin, A. E. Clark, T. He, W. Yim, Y. Li, Y. C. Chang, Z. Wu, P. Fajtová, A. J. O'Donoghue, A. F. Carlin, M. D. Todd and J. V. Jokerst, *Anal. Chem.*, 2022, **94**, 11728–11733.
